# Supplementary figures and images for: MyD88 Deficiency Protects Against Dry Eye–Induced Damage
Source: PubMed Central journal article supplement — Invest Ophthalmol Vis Sci. 2018 Jun;59(7):2967–76. doi: 10.1167/iovs.17-23397 (PMC5991808; doi:10.1167/iovs.17-23397), 2018-06

Sup. Figure 1

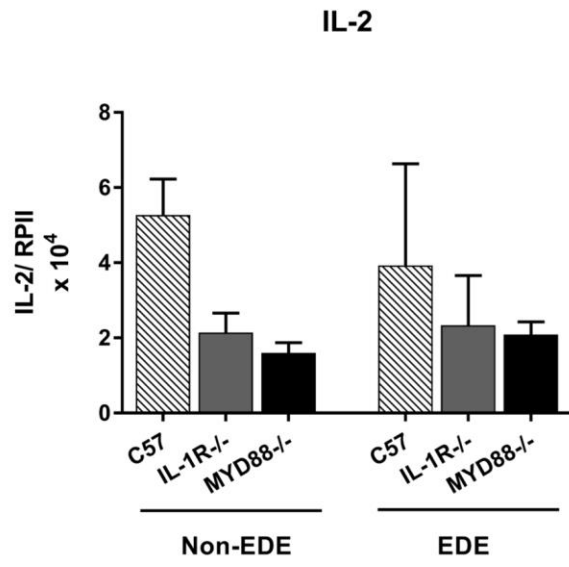

Supplement: iovs-59-06-23_s01.pdf [file iovs-59-06-23_s01.pdf]
